# Supplementary material
Source: PubMed Central journal article supplement (PMC2879775)
Supplement: pp.110.156711_1.pdf [file pp.110.156711_1.pdf]

## Supplemental Data

### Supplemental Figure Legends

#### Supplemental Figure 1. Phenotypes of *osmads34* mutants.

A: Plant morphology of wild type (left), *osmads34-1* (middle) and *osmads34-2* (right) at heading stage. B and C: Stem elongation patterns of *osmads34-1*(B) and *osmads34-2*(C). D: The length pattern of five internodes and the panicle of wild type, *osmads34-1*, *osmads34-2* respectively. Numbers indicate the internode positions of plant from the top to base. E and F: The outer surfaces of lemmas *osmads34-1* (E) and *osmads34-2* (F) showing regular bulges as wild type (arrow). Bar= 10 cm in A , 5 cm in B and C, 50  $\mu$ m in E and F.

#### Supplemental Figure 2. Histological analysis of the mutant spikelets

A and F: Wild-type spikelet. A: Transverse section of the top of a wild-type spikelet (green arrow in Fig. 1D) showing five vascular bundles in the lemma (star), three vascular bundles in the palea and only one vascular bundle in the sterile lemma. F: A close-up of the palea of top transverse section (green arrow in Fig. 1D). Note that four types of cell identity can be observed in the wild type lemma and palea, i.e, silicified cell (sc), fibrous sclerenchymatous cell (fs), spongy parenchymatous cell (spc) and non-silicified cell (nsc).

B: Transverse section of the top of the *osmads34-1* spikelet (green white arrow in Fig. 1E ) showing five vascular bundles (indicated by blue stars) of the sterile lemma.

G: A close-up of the *osmads34-1* palea of top transverse section (green arrow in Fig. 1E) showing four cell types of sc, fs, spc and nsc.

C: Transverse section of the bottom of an *osmads34-2* spikelet (green arrow in Fig. 1F) showing more vascular bundles (indicated by blue stars) in the lemma/leaf-like sterile lemmas.

H: A close-up of palea of *osmads34-2* of top transverse section (green arrow in Fig. 1F). Four cell types of sc, fs, spc and nsc are observed.

D and I: *osmads1-z* spikeletes.

D: Transverse section of the bottom of an *osmads1-z* spikelet showing leafy le/pa, four enlarged lodicules and reduced stamens (green arrow in Fig. 1L).

I: Close-up of the sterile lemma (red arrow in Fig. 1L). The *osmads1-z* sterile lemma

had the similar internal sclerenchymatous cells as wild type.

E and J: *osmads34-1 osmads1-z* spikelets.

E: Transverse section of the top of the *osmads34-1 osmads1-z* spikelet showing le/pa like sterile lemma, leafy le/pa, four enlarged lodicules and reduced stamens (green arrow in Fig. 1M).

J: A close-up of the sterile lemma (red arrow in Fig. 1M), four cell types are observed in elongated sterile lemma.

sl: sterile lemma; **lsl**: lemma/leaf-like sterile lemma; le: lemma; pa: palea; st: stamen; ca: carpel; elo: enlarged lodicules; fs: fibrous sclerenchyma; nsc: non-silicified cell; sc: silicified cell; scl: sclerenchymatous cell; spc: spongy parenchymatous cell.

Bar=100  $\mu$ m in A to E, 50  $\mu$ m in F-J.

### **Supplemental Figure 3. Allelic and complementary analyses of *osmads34* mutants and ectopic expression of *OsMADS34* in wild type.**

A: Panicle of *osmads34-1* (left); F1 plant of *osmads34-1* and *osmads34-2* (middle) showing similar defect to *osmads34-1* and *osmads34-2*; and *osmads34-2* (right). B: RT-PCR analysis of *OsMADS34* transcripts of wild type, *osmads34-1* and *osmads34-2* flowers at stage In 7. The expression level of *OsMADS34* in *osmads34-1* is close to that of wild type, but no detectable transcripts of *OsMADS34* in *osmads34-2*. C: The *osmads34-1* spikelet at In9. D: The Spikelet of F1 plant of *osmads34-1* and *osmads34-2* at stage In9. E: The *osmads34-2* spikelet at stage In9. F: Sequencing analysis of *OsMADS34* from the wild type, *osmads34-1*, *osmads34-2*, as well as the F1 plant of *osmads34-1* and *osmads34-2*, the mutation marked by red box. G: The wild-type panicle at In9. H: The panicle of wild-type plant over expressing *OsMADS34* at In 9. I: The panicle of *osmads34-1* plant over expressing *OsMADS34* at In9. J: The panicle of *osmads34-2* plant over expressing *OsMADS34* at In9. K: The panicle of *osmads34-1* plant at In9. L: The panicle of *osmads34-2* at In9. M: Spikelets of wild type (wt), wild-type plant over expressing *OsMADS34* (wt-OX), *osmads34-1* plant over expressing *OsMADS34* (*osmads34-1-OX*), *osmads34-2* plant over expressing *OsMADS34* (*osmads34-2-OX*), *osmads34-1* and *osmads34-2*. OE means over expressing *OsMADS34*. N: RT-PCR analysis of *OsMADS34* mRNA levels in wild type, *osmads34-1* and transgenic lines. RNA was extracted from young panicles of each plant (Stage In7). OX: Over expression. Bar=2 cm in A and G-L, 2 mm in C-E and 3 mm in M.

**Supplemental Figure 4. Sequence analysis of the *OsMADS34* gene and its homologs.**

A: 38 MADS-box genes from *Lolium perenne*, *Oryza sativa*, *Sorghum bicolor*, *Triticum aestivum* and *Zea mays*, are used to construct Maximum-likelihood (ML) tree using the PHYML software (<http://atgc.lirmm.fr/phyml/>) with the WAG model and an estimated proportion of invariable sites plus 8 categories of gamma distribution of substitution rates and 100 nonparametric bootstrap replicates. The MIKC motifs of 22 grass SEP-like proteins (7 in OsMADS5 clade, 8 in OsMADS1 clade, and 7 in OsMADS34 clade) are indicated, and the exon-intron patterns of 6 grass SEP-like genes are compared.

B: OsMADS1, OsMADS5 and OsMADS34 were aligned to compare their MIKC motifs. We also found that, after the gene duplication, *OsMADS34* acquired distinct sequence structure in its C-terminal region.

**Supplemental Figure 5. Sequence alignment of the *OsMADS34* and its homologs.**

Black dark and grey boxex indicate the similar nucleotides.

**Supplemental Figure 6. OsMADS34 has no transactivational activity, forms homodimer and has no interaction with OsMADS1 in yeast cells.**

**Supplemental Figure 7. Analysis and identification of the *osmads1-z* mutant**

A-C are the allelic test between the *nsr* and *osmads1-z*; A: spikelet of *nsr*; B: spikelet of *osmads1-z*; C: spikelet of F1 progeny of *nsr* and *osmads1-z*. D: RT-PCR analysis of *OsMADS1* in wild-type and *osmads1-z*, no detectable transcript of *OsMADS1* was observed in the *osmads1-z* spikelet at stage In7; E: Identification of the deleted *OsMADS1* fragment in *osmads1-z* with smaller size compared with wild type, M indicates molecular marker.

Bar: 2 mm in A-C.

**Supplemental Table 1. Primers used in this study**

| Name         | Sequence                                                   |
|--------------|------------------------------------------------------------|
| RM3525       | F 5-ACACTCTCAGCTCATCAAGACC-3<br>R 5-GGGCAAGTGGTCAAATCTTG-3 |
| WHM0302      | F 5-CTATAAAAGCTGGACCGTGAA-3<br>R 5-GCAAGCATTCCAAACCGA-3    |
| RM520        | F 5-AGGAGCAAGAAAAGTTCCCC-3<br>R 5-GCCAATGTGTGACGCAATAG-3   |
| RM5813       | F 5-GCAGCCCTAGCAATTCAGTC-3<br>R 5-CTCCCTTTCCCTCCACCAC-3    |
| WHM0312      | F5-CCGACACTTCAGGGAATAAA-3<br>R 5-CGCCAGGACTAAACTAAACAGC-3  |
| LHS0312      | F 5-CGGTACAGCCAGCCAGG-3<br>R 5-TCTAAACAGCTCCATTCCCC-3      |
| RM468        | F 5-CCCTTCCTTGTTGTGGCTAC-3<br>R 5-TGATTTCTGAGAGCCAACCC-3   |
| 34-qRTF      | CAACCAGAGCACTTCTTCCA                                       |
| 34-qRTR      | CTGAAGCTGAAACGGTAGCT                                       |
| OsMADS1-qRTF | ATCACCATCAGGGTCTTCTC                                       |
| OsMADS1-qRTR | CAACCATGTCTGCTGCTTCA                                       |
| G1RTF        | ACGCATTCTGTCACGTCTCT                                       |
| G1RTR        | CTGCGTGAAGGTCTGCCAGT                                       |
| 34-RTF       | 5-ATGGGGCGAGGCAAGGTGG-3                                    |
| 34-RTR       | 5-CTAGGCCATCCACTCAGGAGGATAACC-3                            |
| 34IF         | 5-CAGGAATATGTGAACTTGAAGGCACATGTTGAG-3                      |
| 34IR         | 5-CGAGGGCCTGGAAGAAGTGCT-3                                  |
| OsMADS1-IF   | 5-GCAACTACAACCTCACAGGATGC-3                                |
| OsMADS1-IR   | 5-GATGAGCAACCATGTCTGCTGCT-3                                |
| 34ProF       | 5-AAAAGAATTCCTTACTTTCTCAGACATCGCAACAGGCT-3                 |
| 34ProR       | 5-GGATCCAGCTCGTAGGCCTTCTTG-3                               |
| OsMADS34-YF  | 5-GAATTCATGGGGCGAGGCAAGGTGG-3                              |
| OsMADS34-YR  | 5-GGATCCCTAGGCCATCCACTCAGGAG-3                             |
| OsMADS1-YF   | 5-CGCGGATCCAGATGGGGAGGGGAAGG-3                             |
| OsMADS1-YR   | 5-TGCCTGCAGGGAATGGTCACCC-3                                 |

## Supplemental Figures and Legends

Fig.S1

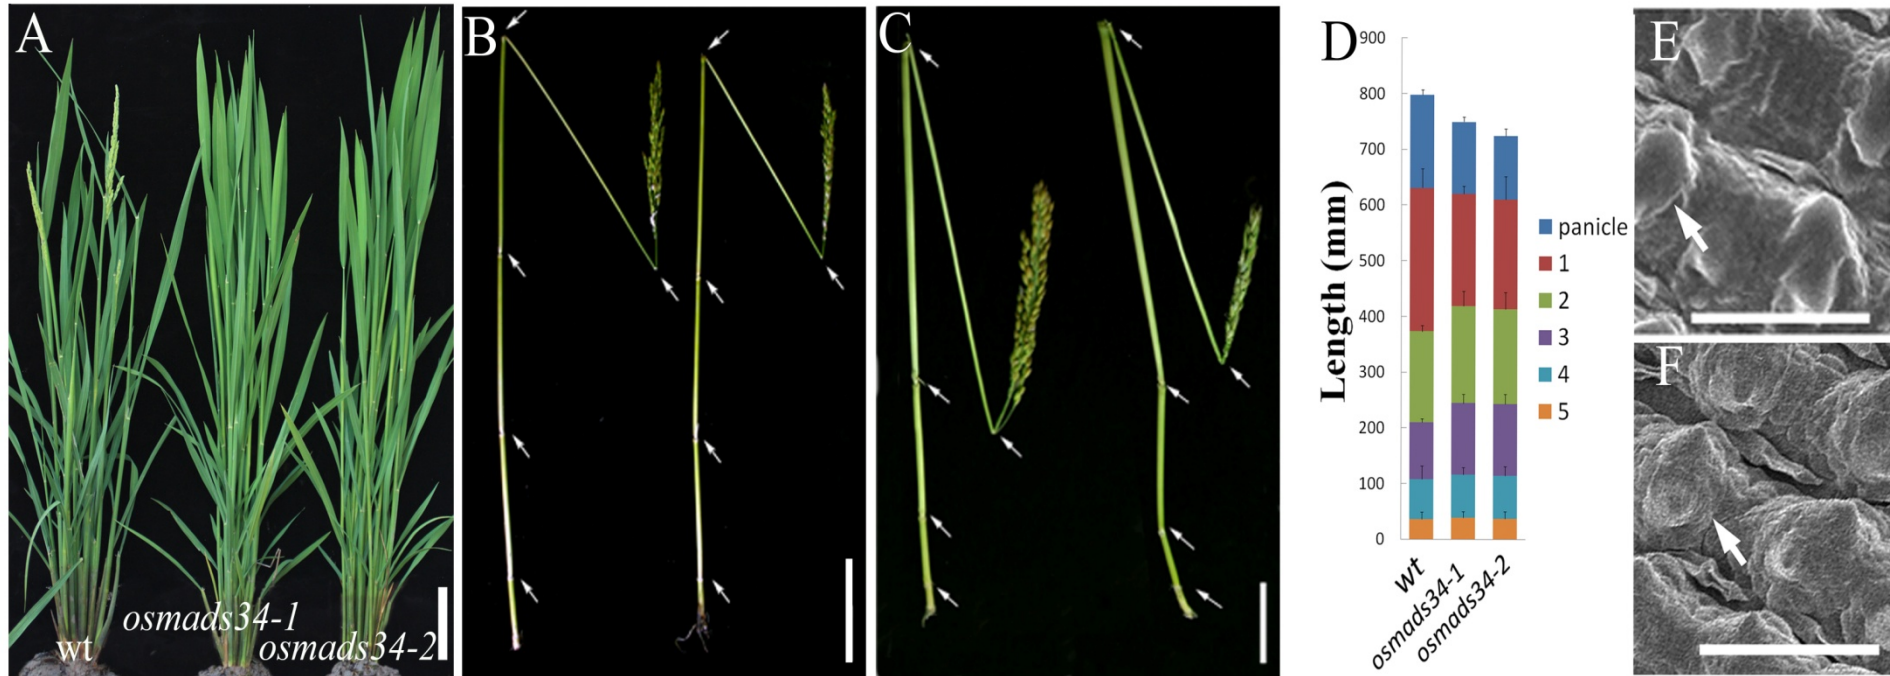

### Supplemental Figure 1. Phenotypes of *osmads34* mutants.

A: Plant morphology of wild type (left), *osmads34-1* (middle) and *osmads34-2* (right) at heading stage. B and C: Stem elongation patterns of *osmads34-1*(B) and *osmads34-2*(C). D: The length pattern of five internodes and the panicle of wild type, *osmads34-1*, *osmads34-2* respectively. Numbers indicate the internode positions of plant from the top to base. E and F: The outer surfaces of lemmas *osmads34-1* (E) and *osmads34-2* (F) showing regular bulges as wild type (arrow). Bar= 10 cm in A , 5 cm in B and C, 50  $\mu$ m in E and F.

Fig.S2

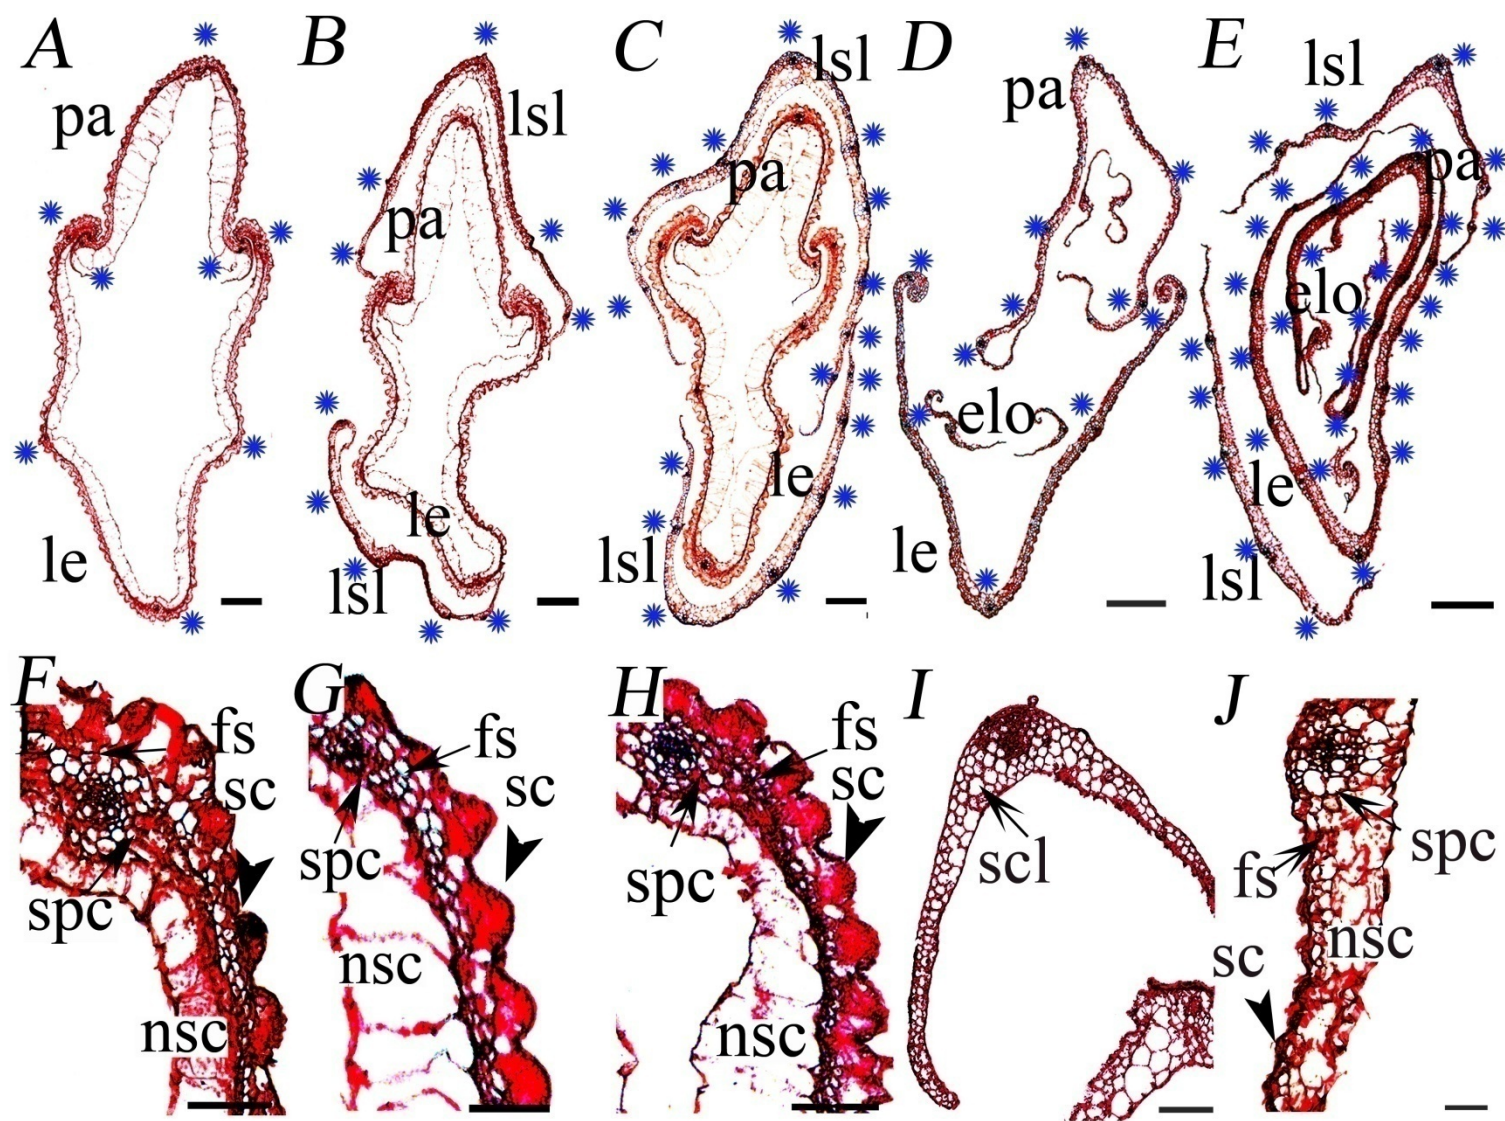

## Supplemental Figure 2. Histological analysis of the mutant spikelets

A and F: Wild-type spikelet. A: Transverse section of the top of a wild-type spikelet (green arrow in Fig. 1D) showing five vascular bundles in the lemma (star), three vascular bundles in the palea and only one vascular bundle in the sterile lemma. F: A close-up of the palea of top transverse section (green arrow in Fig. 1D). Note that four types of cell identity can be observed in the wild type lemma and palea, i.e, silicified cell (sc), fibrous sclerenchymatous cell (fs), spongy parenchymatous cell (spc) and non-silicified cell (nsc).

B: Transverse section of the top of the *osmads34-1* spikelet (green white arrow in Fig. 1E ) showing five vascular bundles (indicated by blue stars) of the sterile lemma.

G: A close-up of the *osmads34-1* palea of top transverse section (green arrow in Fig. 1E) showing four cell types of sc, fs, spc and nsc.

C: Transverse section of the bottom of an *osmads34-2* spikelet (green arrow in Fig. 1F) showing more vascular bundles (indicated by blue stars) in the lemma/leaf-like sterile lemmas.

H: A close-up of palea of *osmads34-2* of top transverse section (green arrow in Fig. 1F). Four cell types of sc, fs, spc and nsc are observed.

D and I: *osmads1-z* spikeletes.

D: Transverse section of the bottom of an *osmads1-z* spikelet showing leafy le/pa, four enlarged lodicules and reduced stamens (green arrow in Fig. 1L).

I: Close-up of the sterile lemma (red arrow in Fig. 1L). The *osmads1-z* sterile lemma had the similar internal sclerenchymatous cells as wild type.

E and J: *osmads34-1 osmads1-z* spikelets.

E: Transverse section of the top of the *osmads34-1 osmads1-z* spikelet showing le/pa like sterile lemma, leafy le/pa, four enlarged lodicules and reduced stamens(green arrow in Fig. 1M).

J: A close-up of the sterile lemma (red arrow in Fig. 1M), four cell types are observed in elongated sterile lemma.

sl: sterile lemma; lsl: lemma/leaf-like sterile lemma; le: lemma; pa: palea; st: stamen; ca: carpel; elo: enlarged lodicules; fs: fibrous sclerenchyma;  
nsc: non-silicified cell; sc: silicified cell; scl: sclerenchymatous cell; spc: spongy parenchymatous cell.  
Bar=100  $\mu\text{m}$  in A to E, 50  $\mu\text{m}$  in F-J.



**Fig.S3**

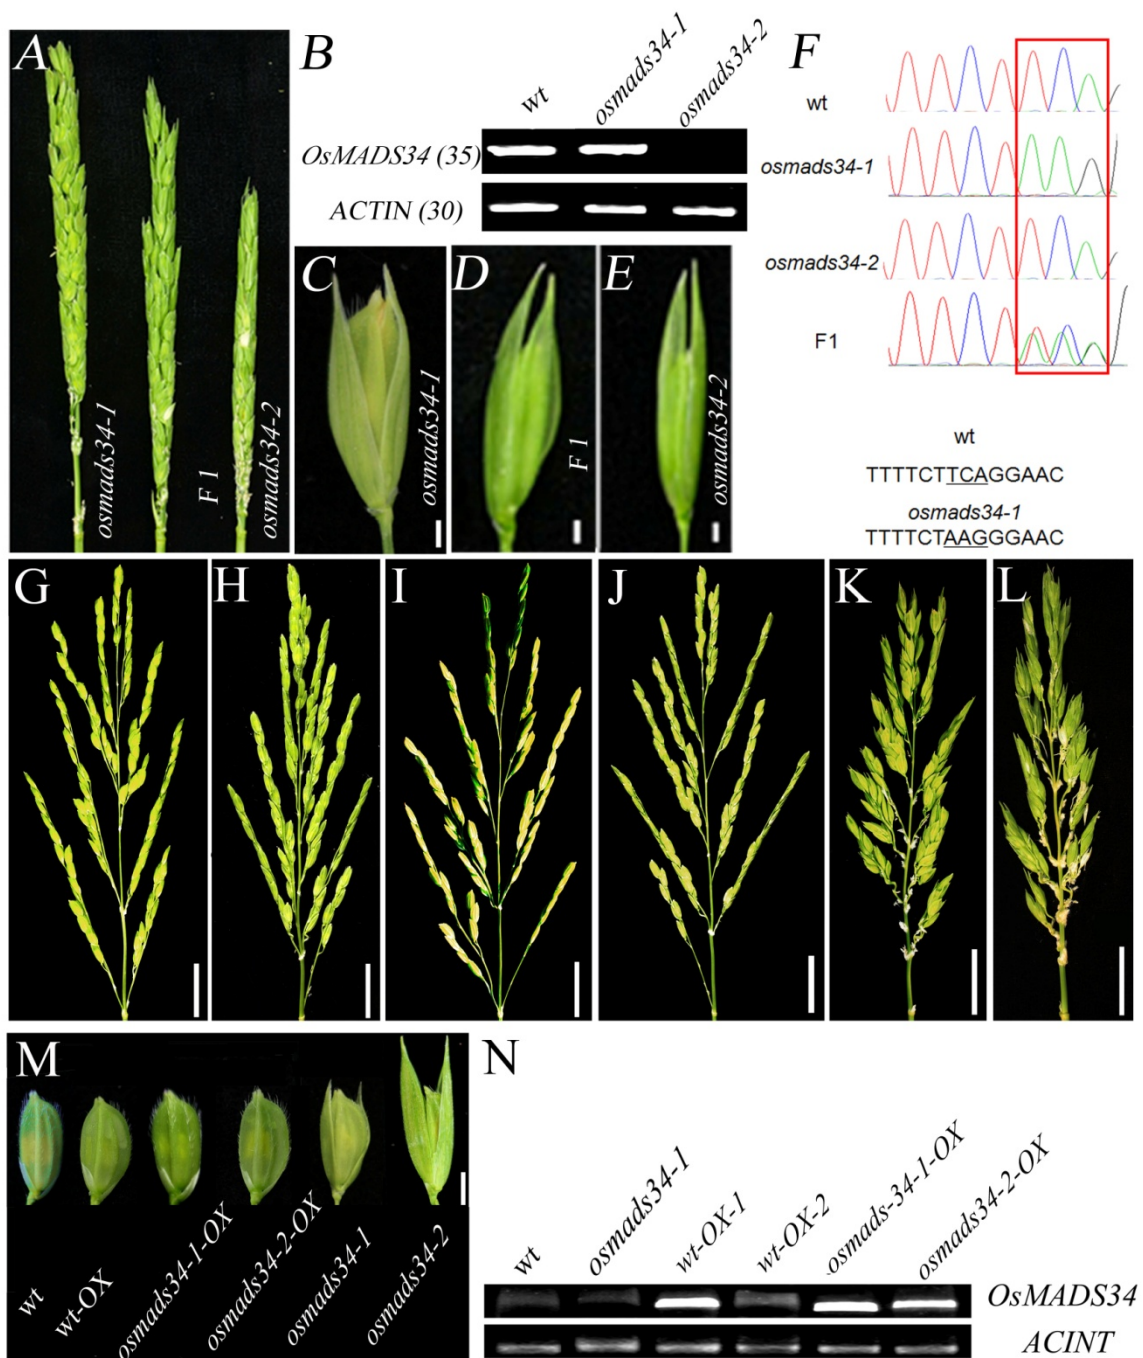

**Supplemental Figure 3. Allelic and complementary analyses of *osmads34* mutants and ectopic expression of *OsMADS34* in wild type.**

A: Panicle of *osmads34-1* (left); F1 plant of *osmads34-1* and *osmads34-2* (middle) showing similar defect to *osmads34-1* and *osmads34-2*; and *osmads34-2* (right). B: RT-PCR analysis of *OsMADS34* transcripts of wild type, *osmads34-1* and *osmads34-1* flowers at stage In 7. The expression level of *OsMADS34* in *osmads34-1*

is close to that of wild type, but no detectable transcripts of *OsMADS34* in *osmads34-2*. C: The *osmads34-1* spikelet at In9. D: The Spikelet of F1 plant of *osmads34-1* and *osmads34-2* at stag In9. E: The *osmads34-2* spikelet at stage In9. F: Sequencing analysis of *OsMADS34* from the wild type, *osmads34-1*, *osmads34-2*, as well as the F1 plant of *osmads34-1* and *osmads34-2*, the mutation marked by red box. G: The wild-type panicle at In9. H: The panicle of wild-type plant over expressing *OsMADS34* at In 9. I: The panicle of *osmads34-1* plant over expressing *OsMADS34* at In9. J: The panicle of *osmads34-2* plant over expressing *OsMADS34* at In9. K: The panicle of *osmads34-1* plant at In9. L: The panicle of *osmads34-2* at In9. M: Spikelets of wild type (wt), wild-type plant over expressing *OsMADS34* (wt-OX), *osmads34-1* plant over expressing *OsMADS34* (*osmads34-1-OX*), *osmads34-2* plant over expressing *OsMADS34* (*osmads34-2-OX*), *osmads34-1* and *osmads34-2*. OE means over expressing *OsMADS34*. N: RT-PCR analysis of *OsMADS34* mRNA levels in wild type, *osmads34-1* and transgenic lines. RNA was extracted from young panicles of each plant (Stage In7). OX: Over expression. Bar=2 cm in A and G-L, 2 mm in C-E and 3 mm in M.

Fig.S4

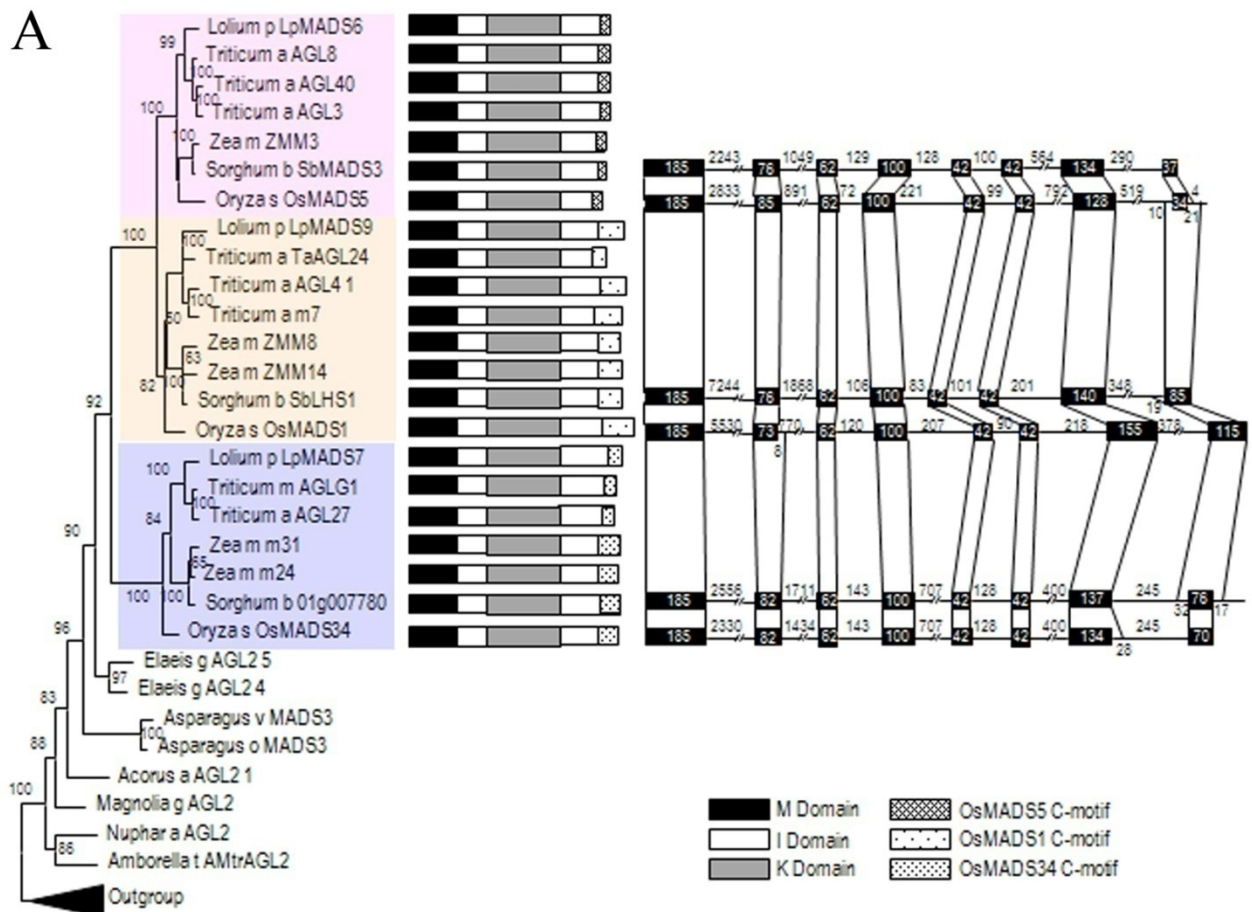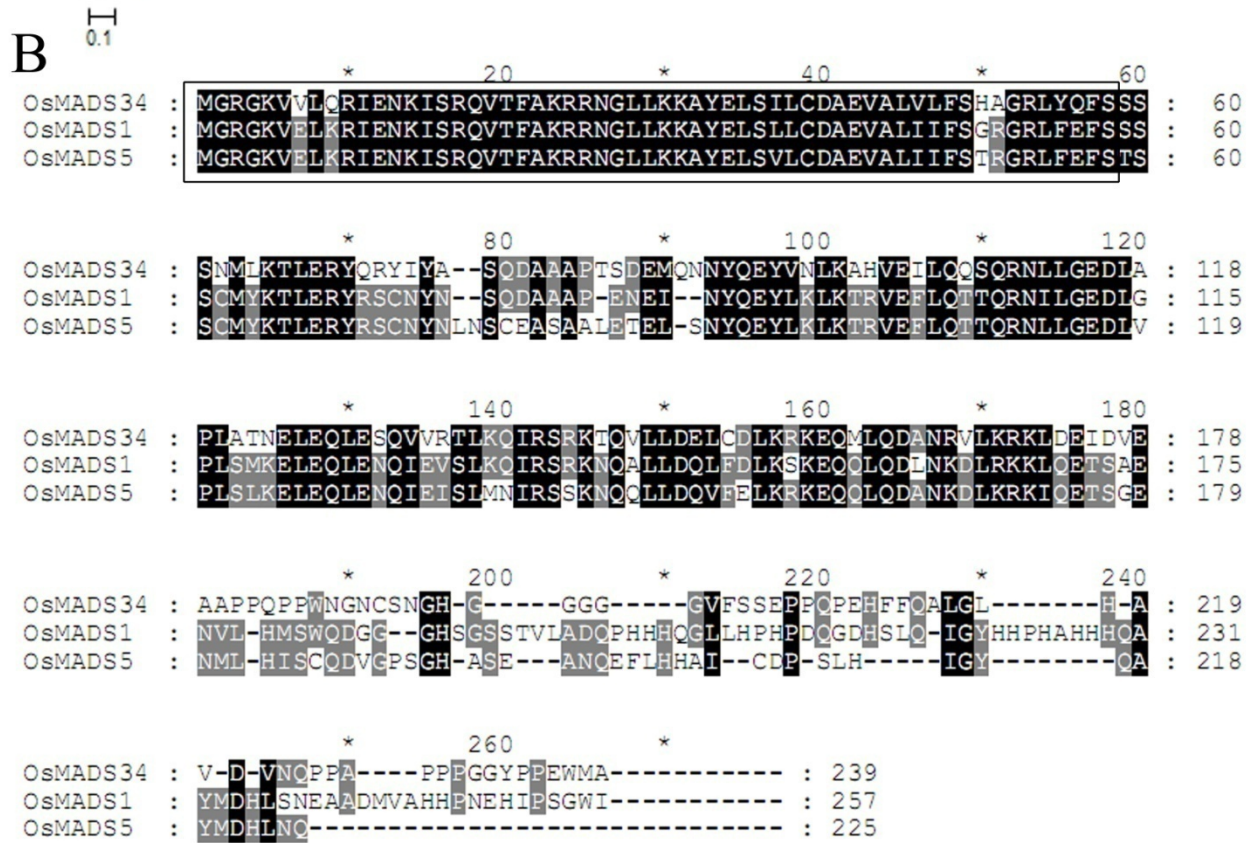

**Supplemental Figure 4. Sequence analysis of the *OsMADS34* gene and its homologs.**

A: 38 MADS-box genes from *Lolium perenne*, *Oryza sativa*, *Sorghum bicolor*, *Triticum aestivum* and *Zea mays*, are used to construct Maximum-likelihood (ML) tree using the PHYML software (<http://atgc.lirmm.fr/phyml/>) with the WAG model and an estimated proportion of invariable sites plus 8 categories of gamma distribution of substitution rates and 100 nonparametric bootstrap replicates. The MIKC motifs of 22 grass SEP-like proteins (7 in OsMADS5 clade, 8 in OsMADS1 clade, and 7 in OsMADS34 clade) are indicated, and the exon-intron patterns of 6 grass SEP-like genes are compared.

B: OsMADS1, OsMADS5 and OsMADS34 were aligned to compare their MIKC motifs. We also found that, after the gene duplication, *OsMADS34* acquired distinct sequence structure in its C-terminal region.

Fig.S5

|            |                                                                             |       |
|------------|-----------------------------------------------------------------------------|-------|
| Zea_m_ZMM3 | : ATGGGGCCGGCAAGSTGGAAGCTCAAGCGGATCGAGAACAAGATCAGCCGGCAGGTGAGGTTGCGCAAGGCC  | : 72  |
| Sorghum_b  | : ATGGGGCCGGCAAGSTGGAAGCTCAAGCGGATCGAGAACAAGATCAGCCGGCAGGTGAGGTTGCGCAAGGCC  | : 72  |
| Triticum_a | : ATGGGGCCGGCAAGSTGGAAGCTCAAGCGGATCGAGAACAAGATCAGCCGGCAGGTGAGGTTGCGCAAGGCC  | : 72  |
| Triticum_a | : -----GGCAAGSTGGAAGCTCAAGCGGATCGAGAACAAGATCAGCCGGCAGGTGAGGTTGCGCAAGGCC     | : 63  |
| Zea_m_ZMM8 | : ATGGGGCCGGCAAGSTGGAAGCTCAAGCGGATCGAGAACAAGATCAGCCGGCAGGTGAGGTTGCGCAAGGCC  | : 72  |
| Lolium_p_L | : ATGGGTCCTGGTAAGSTGGAAGCTCAAGCGGATCGAGAACAAGATCAGCCGGCAGGTGAGGTTGCGCAAGGCC | : 72  |
| Oryza_s_Os | : ATGGGGCCGGCAAGSTGGAAGCTCAAGCGGATCGAGAACAAGATCAGCCGGCAGGTGAGGTTGCGCAAGGCC  | : 72  |
| Triticum_a | : ATGGGTCGGGGAAGSTGGAAGCTCAAGCGGATCGAGAACAAGATCAGCCGGCAGGTGAGGTTGCGCAAGGCC  | : 72  |
| Lolium_p_L | : ATGGGTCGGGGAAGSTGGAAGCTCAAGCGGATCGAGAACAAGATCAGCCGGCAGGTGAGGTTGCGCAAGGCC  | : 72  |
| Triticum_a | : ATGGGTCGGGGAAGSTGGAAGCTCAAGCGGATCGAGAACAAGATCAGCCGGCAGGTGAGGTTGCGCAAGGCC  | : 72  |
| Triticum_a | : -----                                                                     | : -   |
| Oryza_s_Os | : ATGGGGAAGGGGAAGSTGGAAGCTCAAGCGGATCGAGAACAAGATCAGCCGGCAGGTGAGGTTGCGCAAGGCC | : 72  |
| Zea_m_ZMM8 | : ATGGGTCGGGCAAGSTGGAAGCTCAAGCGGATCGAGAACAAGATCAGCCGGCAGGTGAGGTTGCGCAAGGCC  | : 72  |
| Zea_m_ZMM1 | : ATGGGTCGGGCAAGSTGGAAGCTCAAGCGGATCGAGAACAAGATCAGCCGGCAGGTGAGGTTGCGCAAGGCC  | : 72  |
| Sorghum_b  | : ATGGGTCGGGCAAGSTGGAAGCTCAAGCGGATCGAGAACAAGATCAGCCGGCAGGTGAGGTTGCGCAAGGCC  | : 72  |
| Triticum_a | : ATGGGTCGGGCAAGSTGGAAGCTCAAGCGGATCGAGAACAAGATCAGCCGGCAGGTGAGGTTGCGCAAGGCC  | : 72  |
| Triticum_m | : ATGGGTCGGGCAAGSTGGAAGCTCAAGCGGATCGAGAACAAGATCAGCCGGCAGGTGAGGTTGCGCAAGGCC  | : 72  |
| Lolium_p_L | : ATGGGTCGGGCAAGSTGGAAGCTCAAGCGGATCGAGAACAAGATCAGCCGGCAGGTGAGGTTGCGCAAGGCC  | : 72  |
| Zea_m_m31  | : ATGGGGCCGGCAAGSTGGAAGCTCAAGCGGATCGAGAACAAGATCAGCCGGCAGGTGAGGTTGCGCAAGGCC  | : 72  |
| Zea_m_m24  | : ATGGGGCCGGCAAGSTGGAAGCTCAAGCGGATCGAGAACAAGATCAGCCGGCAGGTGAGGTTGCGCAAGGCC  | : 72  |
| Sorghum_b  | : ATGGGGCCGGCAAGSTGGAAGCTCAAGCGGATCGAGAACAAGATCAGCCGGCAGGTGAGGTTGCGCAAGGCC  | : 72  |
| Oryza_s_Os | : ATGGGGCCGGCAAGSTGGAAGCTCAAGCGGATCGAGAACAAGATCAGCCGGCAGGTGAGGTTGCGCAAGGCC  | : 72  |
| Elaeis_g_A | : ATGGGGAAGGGGAAGSTGGAAGCTCAAGCGGATCGAGAACAAGATCAGCCGGCAGGTGAGGTTGCGCAAGGCC | : 72  |
| Elaeis_g_A | : ATGGGGAAGGGGAAGSTGGAAGCTCAAGCGGATCGAGAACAAGATCAGCCGGCAGGTGAGGTTGCGCAAGGCC | : 72  |
| Asparagus  | : ATGGGGAAGGGACGASTGGAAGCTCAAGCGGATCGAGAACAAGATCAGCCGGCAGGTGAGGTTGCGCAAGGCC | : 72  |
| Asparagus  | : ATGGGGAAGGGACGASTGGAAGCTCAAGCGGATCGAGAACAAGATCAGCCGGCAGGTGAGGTTGCGCAAGGCC | : 72  |
| Acorus_a_A | : ATGGGGAAGGGGAAGSTGGAAGCTCAAGCGGATCGAGAACAAGATCAGCCGGCAGGTGAGGTTGCGCAAGGCC | : 72  |
| Amborella  | : ATGGGAAGGGTAGASTGGAAGCTCAAGCGGATCGAGAACAAGATCAGCCGGCAGGTGAGGTTGCGCAAGGCC  | : 72  |
| Nuphar_a_A | : -----                                                                     | : -   |
| Magnolia_g | : -----AAGCCA                                                               | : 6   |
| Oryza_s_Os | : ATGGGGAAGGGTCGGSTGGAAGCTCAAGCGGATCGAGAACAAGATCAGCCGGCAGGTGAGGTTGCGCAAGGCC | : 72  |
| Oryza_s_Os | : ATGGGGAAGGGGAGGSTGGAAGCTCAAGCGGATCGAGAACAAGATCAGCCGGCAGGTGAGGTTGCGCAAGGCC | : 72  |
| Asparagus  | : ATGGGGAAGGGGAGASTGGAAGCTCAAGCGGATCGAGAACAAGATCAGCCGGCAGGTGAGGTTGCGCAAGGCC | : 72  |
| Asparagus  | : ATGGGGAAGGGGAGASTGGAAGCTCAAGCGGATCGAGAACAAGATCAGCCGGCAGGTGAGGTTGCGCAAGGCC | : 72  |
| Acorus_a_A | : -----                                                                     | : -   |
| Magnolia_p | : -----GAAATTAAGATTATCGCCAGGTGAGGTTGCGCAAGGCC                               | : 39  |
| Amborella  | : -----                                                                     | : -   |
| Arabidopsi | : ATGGGAAGGGGAGASTGGAAGCTCAAGCGGATCGAGAACAAGATCAGCCGGCAGGTGAGGTTGCGCAAGGCC  | : 72  |
|            |                                                                             |       |
| Zea_m_ZMM3 | : CCGAACGGGCTGCTCAAGAAGGCTACGAGCTCTCGGTGCTCTGCGACGCGAGGTGCGCCTATCATCTTC     | : 144 |
| Sorghum_b  | : CCGAACGGGCTGCTCAAGAAGGCTACGAGCTCTCGGTGCTCTGCGACGCGAGGTGCGCCTATCATCTTC     | : 144 |
| Triticum_a | : CCGAACGGGCTGCTCAAGAAGGCTACGAGCTCTCGGTGCTCTGCGACGCGAGGTGCGCCTATCATCTTC     | : 144 |
| Triticum_a | : CCGAACGGCCTGCTCAAGAAGGCTACGAGCTCTCGGTGCTCTGCGACGCGTGGGTGCGCCTATCATCTTC    | : 135 |
| Triticum_a | : CCGAACGGGCTGCTCAAGAAGGCTACGAGCTCTCGGTGCTCTGCGACGCGAGGTGCGCCTATCATCTTC     | : 144 |
| Lolium_p_L | : CCGAACGGGCTGCTCAAGAAGGCTACGAGCTCTCGGTGCTCTGCTGACGCGAGGTGCGCCTATCATCTTC    | : 144 |
| Oryza_s_Os | : ACGAACGGGCTGCTCAAGAAGGCTACGAGCTCTCGGTGCTCTGCGACGCGAGGTGCGCCTATCATCTTC     | : 144 |
| Triticum_a | : CCGAATGGGCTGCTCAAGAAGGCTACGAGCTCTCGGTGCTCTGCGACGCGAGGTGCGCCTATCATCTTC     | : 144 |
| Lolium_p_L | : CCGAACGGGTGCTCAAGAAGGCTACGAGCTCTCGTGTGCTTGCGACGCGAGGTGCGCCTATCATCTTC      | : 144 |
| Triticum_a | : CCGAACGGGCTACTCAAGAAGGCTACGAGCTATCGGTGCTCTGCGACGCGAGGTGCGCCTATCATCTTC     | : 144 |
| Triticum_a | : -----CTCTCGGTGCTCTGCGACGCGAGGTGCGCCTGCTCATCTTC                            | : 42  |
| Oryza_s_Os | : ACGAACGGCCTGCTCAAGAAGGCTACGAGCTCTCCCTCCTCTGCGACGCGAGGTGCGCCTATCATCTTC     | : 144 |
| Zea_m_ZMM8 | : ACGAACGGGCTGCTCAAGAAGGCTACGAGCTCTCGGTGCTCTGCGACGCGAGGTGCGCCTATCATCTTC     | : 144 |
| Zea_m_ZMM1 | : CCGAACGGACTGCTCAAGAAGGCTACGAGCTCTCGGTGCTCTGCGACGCGAGGTGCGCCTATCATCTTC     | : 144 |
| Sorghum_b  | : CCGAACGGGCTGCTCAAGAAGGCTACGAGCTCTCGGTGCTCTGCGACGCGAGGTGCGCCTATCATCTTC     | : 144 |
| Triticum_a | : CCGAACGGCCTGCTCAAGAAGGCTACGAGCTCTCCCTCCTCTGCGACGCGAGGTGCGCCTGCTCTCTTC     | : 144 |
| Triticum_m | : CCGAACGGCCTGCTCAAGAAGGCTACGAGCTCTCCCTCCTCTGCGACGCGAGGTGCGCCTGCTCTCTTC     | : 144 |
| Lolium_p_L | : CCGAACGGCCTGCTCAAGAAGGCTACGAGCTCTCCATCCTCTGCGACGCGAGGTGCGCCTGCTCTCTTC     | : 144 |
| Zea_m_m31  | : CCGAACGGCCTGCTCAAGAAGGCTACGAGCTCTCCATCCTCTGCGACGCGAGGTGCGCCTGCTCTCTTC     | : 144 |
| Zea_m_m24  | : CCGAACGGCCTGCTCAAGAAGGCTACGAGCTCTCCGTCCCTCTGCGACGCGAGGTGCGCCTGCTCTCTTC    | : 144 |
| Sorghum_b  | : CCGAACGGCCTGCTCAAGAAGGCTACGAGCTCTCCATCCTCTGCGACGCGAGGTGCGCCTGCTCTCTTC     | : 144 |
| Oryza_s_Os | : CCGAACGGCCTGCTCAAGAAGGCTACGAGCTCTCCATCCTCTGCGACGCGAGGTGCGCCTGCTCTCTTC     | : 144 |
| Elaeis_g_A | : CCGAACGGTGTGCTCAAGAAGGCTACGAGCTCTCCGTCCCTCTGCGACGCGAGGTGCGCCTATCATCTTC    | : 144 |
| Elaeis_g_A | : CCGAACGGATGCTCAAGAAGGCTAAGAGCTCTCTGCTCCTCTGCGACGCGAGGTGCGCCTATCATCTTC     | : 144 |
| Asparagus  | : ACGAATGGATGTTTCAAGAAGGCTACGAGCTCTCGGTGCTCTGCGATGCGAGGTGCTCTGCTCTCTTC      | : 144 |
| Asparagus  | : ACGAATGGATGTTTCAAGAAGGCTACGAGCTCTCGGTGCTCTGCGACGCGAGGTGCTCTGCTCTCTTC      | : 144 |
| Acorus_a_A | : ACGAATGGACTCCTCAAGAAGGCTATGAGCTCTCTGCTCCTCTGCGACGCGAGGTGCGCCTATCATCTTC    | : 144 |
| Amborella  | : ACGAATGGTCTTTTGAAGAAGGCTATGAACTCTCTGCTCTCTGATGCTGAGGTGCGCCTAATCATCTTC     | : 144 |
| Nuphar_a_A | : -----                                                                     | : -   |
| Magnolia_g | : ACGAACGGATGCTCAAGAAGGCTACGAGCTTTCAGTCTCTCTGCGATGCTGAGGTGCTCTATCATCTTC     | : 78  |
| Oryza_s_Os | : ACGAATGGCCTGCTCAAGAAGGCTACGAGCTCTCCGTCCCTCTGCGACGCGAGGTGCGCCTATCATCTTC    | : 144 |
| Oryza_s_Os | : ACGAATGGGCTGCTCAAGAAGGCTACGAGCTCTCCGTGCTCTGCGACGCGAGGTGCGCCTATCATCTTC     | : 144 |
| Asparagus  | : ACGAACGGGCTCCTCAAGAAGGCTACGAGCTCTCCGTCTCTGCGACGCGAGGTGCGCCTGCTCTCTTC      | : 144 |
| Asparagus  | : ACGAACGGACTCCTCAAGAAGGCTACGAGCTCTCCGTGCTCTGCGATGCGAGGTGCGCCTATCATCTTC     | : 144 |
| Acorus_a_A | : -----GGCTGTTTGAAGAAGGCTACGAGCTCTCCGTCCCTCTGCGACGCGTGGGTGCGCCTATCATCTTC    | : 66  |
| Magnolia_p | : CCGAACGGGCTTTTGAAGAAGGCTACGAACTCTCAGTCTCTCTGCGATGCTGAGGTGCTCTATCATCTTC    | : 111 |
| Amborella  | : -----TTC                                                                  | : 3   |
| Arabidopsi | : ACGAATGGTCTTTTGAAGAAGGCTACGAGCTTTCAGTCTCTATGCTGATGAGAACTTCTCTCTATCATCTTC  | : 144 |

Zea\_m\_ZMM3 : TCCAGCCGCGGCGCCTCTTCCGASTTCTCCACCTCCTCATGCATCTACAAAGAGCTGGAGCCATACCGCAGC : 216  
Sorghum\_b\_ : TCCAGCCGCGGCGCCTCTTCCGASTTCTCCACCTCCTCATGCATCTACAAAGAGCTGGAGCCATACCGCAGC : 216  
Triticum\_a\_ : TCCAGCCGCGGCGCCTCTTCCGASTTCTCCACATCCTCATGCATCTACAAAGAGCTGGAGCCATACCGCAGC : 216  
Triticum\_a\_ : TCCGCGCGGCGGCGCCTCTTCCGASTTCTCCACATCCTCACGCATCTACAAAGAGCTTAGAACCTACCGCAGC : 207  
Triticum\_a\_ : TCCAGCCGCGGCGCCTCTTCCGASTTCTCCACATCCTCATGCATCTACAAAGAGCTTAGAACCTACCGCAGC : 216  
Lolium\_p\_L : TCCAGCCGCGGCGCCTCTTCCGASTTCTCCACATCCTCATGCATCTACAAAGAGCTGGAGCCATACCGCAGC : 216  
Oryza\_s\_Os : TCCAGCCGCGGCGCCTCTTCCGASTTCTCCACCTCCTCATGCATCTACAAAGAGCTGGAGCCATACCGCAGC : 216  
Triticum\_a\_ : TCCGCGCGGCGGCGCCTCTTCCGASTTCTCCAGCTCCTCATGCATCTACAAAGAGCTGGAGCCATACCGTACC : 216  
Lolium\_p\_L : TCCAGCCGCGGCTCCGCTCTTCCGASTTCTCCAGCTCATCGTGCATTTATAAAACACTTGAAAGCTACCGCACT : 216  
Triticum\_a\_ : TCCGCGCGGCGGCGCCTCTTCCGASTTCTCCAGCTCCTCATGCATCTACAAAGAGCTGGAGCCATACCGCACC : 216  
Triticum\_a\_ : TCCGCGCGGCGGCGCCTCTTCCGASTTCTTAGCTCCTCATGCATCTACAAAGAGCTGGAGCCATACCGCACC : 114  
Oryza\_s\_Os : TCCGCGCGGCGGCGCCTCTTCCGASTTCTCCAGCTCATCATGCATCTACAAAGAGCTGGAGCCATACCGCAGC : 216  
Zea\_m\_ZMM8 : TCCGCGCGGCGGCGCCTCTTCCGASTTCTCCAGCTCCTCATGCATCTACAAAGAGCTGGAGCCATACCGCAGC : 216  
Zea\_m\_ZMM1 : TCCGCGCGGCGGCGCCTCTTCCGASTTCTCCAGCTCCTCATGCATCTACAAAGAGCTGGAGCCATACCGCAGC : 216  
Sorghum\_b\_ : TCCGCGCGGCGGCGCCTCTTCCGASTTCTCCAGCTCCTCATGCATCTACAAAGAGCTGGAGCCATACCGCAGC : 216  
Triticum\_a\_ : TCCAGCCGCGGCGCCTCTTCCGASTTCTCCCTCCTCAAACATCTTTAAGAGCTGGAGCCATACCGAGG : 216  
Triticum\_m\_ : TCCAGCCGCGGCGCCTCTTCCGASTTCTCCCTCCTCAAACATCTTTAAGAGCTGGAGAGTACCGAGAGG : 216  
Lolium\_p\_L : TCCAGCCGCGGCGCCTCTTCCGASTTCTCCCTCCTCAAACATCTTTAAGAGCTGGAGCCATACCGAGG : 216  
Zea\_m\_m31 : TCCAGCCGCGGCGCCTCTTCCGASTTCTCCCTCCTCAAACATCTTTAAGAGCTGGAGCCATACCGAGG : 216  
Zea\_m\_m24 : TCCAGCCGCGGCGCCTCTTCCGASTTCTCATCTCCTCAAACATCTTTAAGAGCTGGAGCCATACCGAGG : 216  
Sorghum\_b\_ : TCCAGCCGCGGCGCCTCTTCCGASTTCTCATCTCCTCAAACATCTTTAAGAGCTGGAGCCATACCGAGG : 216  
Oryza\_s\_Os : TCCAGCCGCGGCGCCTCTTCCGASTTCTCATCTCCTCAAACATCTTTAAGAGCTGGAGCCATACCGAGG : 216  
Elaeis\_g\_A : TCCAGCCGCGGCGCCTCTTCCGASTTCTCCAGAGCTCCAGCATCTTTAAGAGCTGGAAAGCTACCGAAAGA : 216  
Elaeis\_g\_A : TCCAGCCGCGGCGGCTTCCGASTTCTCCAGAGCTCCAGCATCTTTAAGAGCTGGAGCCATACCGAAACA : 216  
Asparagus\_ : TCTAATCCAGGAGGCTCTTCCGASTTCTCCAGAGCTCCAGCATCTTTAAGAGCTGGAGCCATACCGAAACA : 216  
Asparagus\_ : TCCAAACCCAGGAGGCTCTTCCGASTTCTCCAGAGCTCCAGCATCTTTAAGAGCTGGAGCCATACCGAAACA : 216  
Acorus\_a\_A : TCCAAACCCAGGAGGCTCTTCCGASTTCTCCAGAGCTCCAGCATCTTTAAGAGCTGGAGCCATACCGAAACA : 216  
Amborella\_ : TCCAAATACAGGAAGCTTTCCGASTTCTTAGACCTCCTAGCATCTTTAAGAGCTGGAGCCATACCGAAACA : 216  
Nuphar\_a\_A : -----GATGAATTTCCGASTTCTTAGACCTCCTAGCATCTTTAAGAGCTGGAGCCATACCGAAACA : 54  
Magnolia\_g : TCCAAACCCAGGAAAGCTCTTCCGASTTCTCCAGAGCTCCAGCATCTTTAAGAGCTGGAGCCATACCGAAACA : 150  
Oryza\_s\_Os : TCCAAACCCGGAAGCTCTTCCGASTTCTCCAGAGCTCCAGCATCTTTAAGAGCTGGAGCCATACCGAAACA : 216  
Oryza\_s\_Os : TCCAAACCCGGAAGCTCTTCCGASTTCTCCAGAGCTCCAGCATCTTTAAGAGCTGGAGCCATACCGAAACA : 216  
Asparagus\_ : TCCAACTCCAGGAAAGCTCTTCCGASTTCTCCAGAGCTCCAGCATCTTTAAGAGCTGGAGCCATACCGAAACA : 216  
Asparagus\_ : TCCAAACCCGGAAGCTCTTCCGASTTCTCCAGAGCTCCAGCATCTTTAAGAGCTGGAGCCATACCGAAACA : 216  
Acorus\_a\_A : TCCGCGCGGCGGCGCCTCTTCCGASTTCTCCAGAGCTCCAGCATCTTTAAGAGCTGGAGCCATACCGAAACA : 138  
Magnolia\_p : TCCAAATACAGGAAGCTCTTCCGASTTCTCCAGAGCTCCAGCATCTTTAAGAGCTGGAGCCATACCGAAACA : 183  
Amborella\_ : TCTAAACCCAGGAAAGCTTTCCGASTTCTTAGACCTCCTAGCATCTTTAAGAGCTGGAGCCATACCGAAACA : 75  
Arabidopsi : TCAAAATACAGGAAGCTTTCCGASTTCTTAGACCTCCTAGCATCTTTAAGAGCTGGAGCCATACCGAAACA : 216

Zea\_m\_ZMM3 : TCGAATTTGTCATCC---GAAGCATCACTCCACTAGAGGCTGAATTAATTTATCAGGAGTACTTGAAGTTA : 285  
Sorghum\_b\_ : TCGAATTTGTCATCC---GAAGCATCACTCCACTAGAGGCTGAATTAATTTATCAGGAGTACTTGAAGTTA : 285  
Triticum\_a\_ : TCGAATTTCAACTCC---GAGGAACTTCAACTCCAGGAGTCCGAA---GATTACAGGAGTATTTAAGGCTA : 282  
Triticum\_a\_ : TGTAACTTCAACTCC---GAGGAACTTCAACTCCAGGAGTCCGAACTACTACAGGAGTATTTAAGGCTA : 276  
Triticum\_a\_ : TCGAATTTCAACTCC---GAGGAACTTCAACTCCAGGAGTCCGAACTACTACAGGAGTACTTGAAGGCTG : 285  
Lolium\_p\_L : TCGAATTTCAACTCC---AAGGAACTTCAACTCCAGGAGTCCGAACTACTACAGGAGTATTTAAGGCTG : 285  
Oryza\_s\_Os : TCGAATTTCAACTCCAGTGTGAAGTCTCTCCAGGAGTCCGAACTACTACTAATTTACAGGAGTACTTGAAGTTA : 288  
Triticum\_a\_ : TCGAATTTCAACTCCAGGAAAGCAACACTCCGCTAGAAATGAATTTAATTTACAGGAGTATTTGAAGGCTC : 288  
Lolium\_p\_L : TCGAATTTCAACTCCAGGAAAGCAACACTCCGCTAGAAATGAATTTAATTTACAGGAGTATTTGAAGGCTC : 288  
Triticum\_a\_ : TCGAATTTCAACTCCAGGAAAGCAACACTCCGCTAGAAATGAATTTAATTTACAGGAGTATTTGAAGGCTC : 288  
Oryza\_s\_Os : TCGAATTTCAACTCCAGGAAAGCAACACTCCGCTAGAAATGAATTTAATTTACAGGAGTATTTGAAGGCTC : 285  
Triticum\_a\_ : TCGAATTTCAACTCCAGGAAAGCAACACTCCGCTAGAAATGAATTTAATTTACAGGAGTATTTGAAGGCTC : 288  
Zea\_m\_ZMM8 : TCGAATTTCAACTCCAGGAAAGCAACACTCCGCTAGAAATGAATTTAATTTACAGGAGTATTTGAAGGCTC : 288  
Zea\_m\_ZMM1 : TCGAATTTCAACTCCAGGAAAGCAACACTCCGCTAGAAATGAATTTAATTTACAGGAGTATTTGAAGGCTC : 285  
Sorghum\_b\_ : TCGAATTTCAACTCCAGGAAAGCAACACTCCGCTAGAAATGAATTTAATTTACAGGAGTATTTGAAGGCTC : 288  
Triticum\_a\_ : TCGAATTTCAACTCCAGGAAAGCAACACTCCGCTAGAAATGAATTTAATTTACAGGAGTATTTGAAGGCTC : 288  
Triticum\_m\_ : TCGAATTTCAACTCCAGGAAAGCAACACTCCGCTAGAAATGAATTTAATTTACAGGAGTATTTGAAGGCTC : 288  
Lolium\_p\_L : TCGAATTTCAACTCCAGGAAAGCAACACTCCGCTAGAAATGAATTTAATTTACAGGAGTATTTGAAGGCTC : 288  
Zea\_m\_m31 : TCGAATTTCAACTCCAGGAAAGCAACACTCCGCTAGAAATGAATTTAATTTACAGGAGTATTTGAAGGCTC : 288  
Zea\_m\_m24 : TCGAATTTCAACTCCAGGAAAGCAACACTCCGCTAGAAATGAATTTAATTTACAGGAGTATTTGAAGGCTC : 288  
Sorghum\_b\_ : TCGAATTTCAACTCCAGGAAAGCAACACTCCGCTAGAAATGAATTTAATTTACAGGAGTATTTGAAGGCTC : 288  
Oryza\_s\_Os : TCGAATTTCAACTCCAGGAAAGCAACACTCCGCTAGAAATGAATTTAATTTACAGGAGTATTTGAAGGCTC : 288  
Elaeis\_g\_A : TCGAATTTCAACTCCAGGAAAGCAACACTCCGCTAGAAATGAATTTAATTTACAGGAGTATTTGAAGGCTC : 288  
Elaeis\_g\_A : TCGAATTTCAACTCCAGGAAAGCAACACTCCGCTAGAAATGAATTTAATTTACAGGAGTATTTGAAGGCTC : 288  
Asparagus\_ : TCGAATTTCAACTCCAGGAAAGCAACACTCCGCTAGAAATGAATTTAATTTACAGGAGTATTTGAAGGCTC : 282  
Asparagus\_ : TCGAATTTCAACTCCAGGAAAGCAACACTCCGCTAGAAATGAATTTAATTTACAGGAGTATTTGAAGGCTC : 282  
Acorus\_a\_A : TCGAATTTCAACTCCAGGAAAGCAACACTCCGCTAGAAATGAATTTAATTTACAGGAGTATTTGAAGGCTC : 288  
Amborella\_ : TCGAATTTCAACTCCAGGAAAGCAACACTCCGCTAGAAATGAATTTAATTTACAGGAGTATTTGAAGGCTC : 288  
Nuphar\_a\_A : TCGAATTTCAACTCCAGGAAAGCAACACTCCGCTAGAAATGAATTTAATTTACAGGAGTATTTGAAGGCTC : 126  
Magnolia\_g : TCGAATTTCAACTCCAGGAAAGCAACACTCCGCTAGAAATGAATTTAATTTACAGGAGTATTTGAAGGCTC : 222  
Oryza\_s\_Os : TCGAATTTCAACTCCAGGAAAGCAACACTCCGCTAGAAATGAATTTAATTTACAGGAGTATTTGAAGGCTC : 288  
Oryza\_s\_Os : TCGAATTTCAACTCCAGGAAAGCAACACTCCGCTAGAAATGAATTTAATTTACAGGAGTATTTGAAGGCTC : 288  
Asparagus\_ : TCGAATTTCAACTCCAGGAAAGCAACACTCCGCTAGAAATGAATTTAATTTACAGGAGTATTTGAAGGCTC : 288  
Asparagus\_ : TCGAATTTCAACTCCAGGAAAGCAACACTCCGCTAGAAATGAATTTAATTTACAGGAGTATTTGAAGGCTC : 288  
Acorus\_a\_A : TCGAATTTCAACTCCAGGAAAGCAACACTCCGCTAGAAATGAATTTAATTTACAGGAGTATTTGAAGGCTC : 210  
Magnolia\_p : TCGAATTTCAACTCCAGGAAAGCAACACTCCGCTAGAAATGAATTTAATTTACAGGAGTATTTGAAGGCTC : 255  
Amborella\_ : TCGAATTTCAACTCCAGGAAAGCAACACTCCGCTAGAAATGAATTTAATTTACAGGAGTATTTGAAGGCTC : 147  
Arabidopsi : TCGAATTTCAACTCCAGGAAAGCAACACTCCGCTAGAAATGAATTTAATTTACAGGAGTATTTGAAGGCTC : 288



Zea\_m\_ZMM3 : ATGCTCGACCACTCGATCTCAAGCGCAAGGAACAACAACCTGCAAGATGCTAACAAAGATTAAAGAAATGAAG : 501  
Sorghum\_b\_ : ATGCTCGACCAACTCGATCTCAAGCGCAAGGAACAACAACCTGCAAGATGCTAACAAAGACTTAAGAAGGAAG : 501  
Triticum\_a\_ : TCATTTGATCAGCTCGAGCTCAAGCGCAAGGAACAACAACCTGCAAGATGTTAATAAAGACTTACGAAGAAG : 498  
Triticum\_a\_ : TCACTTGATCAGCTCGAGCTCAAGCGCAAGGAACAACAACCTGCAAGATGTTAATAAAGACTTACGAAAAAAG : 492  
Triticum\_a\_ : TCACTTGATCAGCTCGAGCTCAAGCGCAAGGAACAACAACCTGCAAGATGTTAATAAAGACTTACGGAGAAG : 501  
Lolium\_p\_L : TCATTTGATCAGCTCGAGCTCAAGCGCAAGGAACAACAACCTGCAAGATGTTAACAAGACTTAAGAAGGAAG : 501  
Oryza\_s\_Os : TTGCTTGATCAAGTAGAGCTCAAACTAAGGAACAACAACCTGCAAGATGCTAATAAAGACTTAANAAGGAAG : 504  
Triticum\_a\_ : TTACTCGATCAGCTAGAAGTAAAGTAAAGGAGCAAGAATTCGAGGATGAAAACAATGACTTGAGGAGAAG : 504  
Lolium\_p\_L : TTAGTTGACCAGCTAGACCTGAAAATTAAGGAGCAAGAATTCGAGGATCAAAAACAAGACTTGAGGAGAAG : 504  
Triticum\_a\_ : TTACTTGATGAGCTAGACCTGAAAATTAAGGAGCAAGAATTCGAGGATCAAAAACAAGACTTGAGGAGAAG : 504  
Triticum\_a\_ : TTACTTGATGAGTTAGACCAGAAAATTAAGGAGCAAGAATTCGCTGATCAAAAACAAGACTTGAGGAGAAG : 402  
Oryza\_s\_Os : CTGCTTGATCAGCTGATCTGAAGAGCAAGGAGCAACAGCTGCAAGATCTCAACAAGACTTGAGGAAAAAG : 501  
Zea\_m\_ZMM8 : CTACTCGATCAGCTCGATCTCAAAAGCAAGGAACAAGAATTCGAGGATCTCAACAAGACTTAAGGAAAAAG : 504  
Zea\_m\_ZMM1 : CTACTTGATCAGCTCGACTCAAAAGCAAGGAACAAGAATTCGCTGATCTCAATAAAGACTTAAGGAGCAG : 501  
Sorghum\_b\_ : TTACTTGATCAGCTCGATCTCAAAAGCAAGGAACAAGAATTCGAGGATCTCAATAAAGACTTAAGGAAAAAG : 504  
Triticum\_a\_ : CTGCTAGATGAATTTGACCTGAAGAGAAAAGGACAAATGTTACAGGATGCAAAACAATGACCTGAAAAGAAAG : 504  
Triticum\_m : CTGCTGGATGAATTTGACCTGAAGAGAAAAGGACAAATATTCGAGGATGCAAAACAATGACCTGAAAAGAAAG : 504  
Lolium\_p\_L : CTACTCGATCAGCTCGACTGAAGAGAAAAGGAACAATGTTAGAGGACGCAAAACTTGACCTGAAAAGGAAG : 504  
Zea\_m\_m31 : TTACTTGATGAACTTCACTTAAAGAGAAAAGGAACAATGCTGCAAGACGCTAACAGGGTTCTGAAAAGGAAG : 504  
Zea\_m\_m24 : TTACTTGATGAACTTCACTTAAAGAGAAAAGGAACAATGCTGCAAGATGCAAAACAAGGGTTCTGAAAAGGAAG : 504  
Sorghum\_b\_ : TTACTTGATGAACTTCACTTAAAGAGAAAAGGAACAATGCTGCAAGATGCAAAACAAGGGTTCTGAAAAGGAAG : 504  
Oryza\_s\_Os : CTACTTGATGAACTTCACTTAAAGAGAAAAGGAACAATGCTGCAAGATGCAAAACAAGGGTTCTGAAAAGGAAG : 504  
Elaeis\_g\_A : ATGCTCGATCAGCTTCACTTAAAGAGAAAAGGAACAAGAGATTCGAGGAAAACAACAATGACTCAACAGGAAG : 504  
Elaeis\_g\_A : -----CAACAATGTTGCAAGAAGTAAATAGAGAACTAANAAGAAAG : 465  
Asparagus\_ : ATGCTTGACCAGTTGATCTTAAAGGAAAGCAACAAGCCTTCGAGGAAAGCAATAGAGACTTGAAGAGAAG : 498  
Asparagus\_ : ATGCTTGACCAGTTGATCTTAAAGGAAAGCAACAATGCTTCGAGGAAAGCAATAGAGACTTGAAGAGAAG : 498  
Acorus\_a\_A : ATGCTTGACCAGCTTCACTTAAAGGAAAGGAACAACAATGTTGCAAGGATGCAAAACAATGACTTGAAGAGAAG : 504  
Amborella\_ : ATGTTGATCAACTTCACTTAAAGGAAAGGAACAACAATGCTTCAAGAGCAACAACAAGCTTTGAACGTAAG : 504  
Nuphar\_a\_A : ATGCTTGATCAGCTTCACTTAAAGGAAAGGAACAACAATGCTTCAAGATGCTAACAATGGCCCTAGTGAGGAAG : 342  
Magnolia\_g : ATGCTTGATCAGCTTCACTTAAAGGAAAGGAACAACAATGCTTGGTGAAGCAACAAGGCTTGAAGAGAAG : 438  
Oryza\_s\_Os : CTGGTTGACCAACTGAGCTTCAGAGAAAAGGAACAACAATGGTTCTGAAAGCAAAATAGATGCCTTAGGAGAAA : 504  
Oryza\_s\_Os : ATGCTTGATCAGCTCGATCTCCAGAGGAAAGGAACAACAATGTTGTTGAAAGCAAAATAGTGCCTGAGAAGAAA : 504  
Asparagus\_ : ATGCTCGATCAGCTTCACTTGAAGAGAAAAGGAACAACAATGTTATGTCAGGCTAATAGGAGCTTGAAGAGAAG : 504  
Asparagus\_ : ATGCTCGACCAGCTTCACTTCAAAAGCAAGGAACAACAATGCTTGTGAGGCTAATAGGAGTCTGAGAAGACCG : 504  
Acorus\_a\_A : ATGCTTGATCACTAGATCTTCAAAAGAAAAGGAACAACAATGCTTGGTTGAAAACAACAAGAGACTTGAAGAGAAG : 426  
Magnolia\_p : ATGCTCGATCAGCTTCACTTCAAAAGAAAAGGAACAACAATGCTTGTGAAAGCAACAAGACACTGACACGAAAG : 471  
Amborella\_ : ATGCTCGATCAGCTTCACTTCAAAAGAAAAGGAACAACAATGCTTATCGAATCTAACAATGCTTTGAAAAGGAAG : 363  
Arabidopsi : ATGCTTGACCAGCTCGATCTTCAGAGTAAAGGAAGGCATGCTGACTGAGACAACAATAAACTCTAAGACTAAG : 504

Zea\_m\_ZMM3 : ATACAAGAAACTAGTGAAGTGTCTGACTGTCTACCCAGGATGGGTGTAGTGGATCTAGTGGGCATGGTGAA : 573  
Sorghum\_b\_ : ATACAAGAAACTAGTGAAGTGTCTGACTGTCTTCCAGGACGGGTGTAGTGGATCTAGTGGGCATGGTGAA : 573  
Triticum\_a\_ : ATACAAGAAACTAGTGAAGTGTCTACAGATGTTTCCAGGATGGACTAGTGGATCTAGTGGGCATGGTCAA : 570  
Triticum\_a\_ : ATACAAGAAACTGGTGTAGTGTCTACAGATGTTTCCAGGATGGACCAAGTGGGTCTAGTGGGCATGGTCAA : 564  
Triticum\_a\_ : ATACAAGAAACTAGTGAAGTGTCTCAAAATGTCTTCCAGGATGGACCTAGTGGGTCTAGTGGGCATGGTCAA : 573  
Lolium\_p\_L : ATACAAGAAACTAGTGAAGTGTCTATATGTCTTCCAGGATGGACCTAGTGGGTCTAGTGGACAGGCTCAA : 573  
Oryza\_s\_Os : ATACAAGAAACTAGTGAAGTGTCTCATATATCTTCCAGATGGGCCCAGTGGCCATGCTAGTGAAGCTCAA : 576  
Triticum\_a\_ : TTGGCAAGTACCAGTGGAGCGGTCATATGTCTTCCAGAGACGGGCTGTAGTCCAGA----- : 564  
Lolium\_p\_L : TTGCAAGACCCATCGAAGCAGTTTACATGCTCTGCAAGATGGACAGAAT-----AGTGGGCATGCCGAG : 570  
Triticum\_a\_ : TTGCAAGTACCAGCCAGGCGCCCATATGGCTTGCAGATGGACAGATAGCTCAAGTGGGCATGTCCGAT : 576  
Triticum\_a\_ : TTGCAAGACATCAGCGAGGCGCTCATATGTCTTCCAGAT-----GGGCATGCCGAG : 456  
Oryza\_s\_Os : TTACAGGAAACCAGTGAAGTGTCTATATGTCTTGCAGATGGGCACAGCGGTTCTAGCACTGTTCTTGAT : 573  
Zea\_m\_ZMM8 : CTGCAAGAAACAAGTCAAGGTGATCCAGCTCTCCTGGCAAGAGGGCACAGTGGGAGTAGT-----GTTGTT : 570  
Zea\_m\_ZMM1 : CTGCAAGAAACAAGGAGGCGCTCGTGTCTCCTGGAGGAAGGGCACAGTGGCCAAAGTGGGAATGTTGAT : 573  
Sorghum\_b\_ : CTGCAAGAAACAAGTGAAGTGTCTCATGTTAGCTGGCAAGGAGGGCACAGTGGCCCAAGTGGGAATGTTGAT : 576  
Triticum\_a\_ : CTGGCCAGATCCAGGAGCCACAGCAGCAGATGTTGCCAGGACGGCGTGCCGCCCCACACGCTCCGCAAGGAG : 576  
Triticum\_m : CTGGCCAGATCCAGGAGCCCGCCAGCAGATGTTGCCAGGACGGCGTGCCGCCCCACACGCTCCGCAAGGAG : 576  
Lolium\_p\_L : CTGGCCAGATGGAGGACCCGCGCAGCAGCTGTTGCCAGGACGGCGTGCCGCCCCACACGCTCCGCAAGGAG : 576  
Zea\_m\_m31 : CTGCAAGAGTTTGAGGAGCCCCCAACAATGGCTTGGCAAGGAGGCATGTTGTCCCATGACCTCCACAGGAA : 576  
Zea\_m\_m24 : CTGGCCAGTTTGAGGAGCCCCCGCAGTTAGCGTGGCAAGAGGCATGTTGTCCCATGACCTCCACAGGAA : 576  
Sorghum\_b\_ : GTAAAGTCAAGT----- : 516  
Oryza\_s\_Os : CTGACAGATCGACGAGCCCCCAAGCCTCCATGGAACAAGGGCTGTTTTCCAGTGAAGCTCCCAAGAG : 576  
Elaeis\_g\_A : TTGCGAGAGGAGCTCAACCCCTCAATGACATGGCAAAATGGTGTGCTTCAATCAAAATGTAATCGTGTCT : 576  
Elaeis\_g\_A : TTACAAGAAAGCCATTTATCCCTCAAGTGGTCAATGATATAATGGTGTGCTCCGATCCGATTTGTAATCACTCT : 537  
Asparagus\_ : TTGCAAGAACCCGTTAGACCCATGGGATATCATGGCAGGTGGCTCGTGTGAGCTGATGCAATGCTCGA : 570  
Asparagus\_ : TTGCAAGAACCCGATAGACCCGTTGGGATTTTCAATGGCAGGTGGCTCGTGTGCT---GATTTGGATCCCTCGA : 567  
Acorus\_a\_A : TTGGATTAATAATGACCCTTCAACTATCATGGCACAATGGCCAAATGTTCTTATGGAGCCAGACT : 576  
Amborella\_ : TTGGAGGAGCAAGCTCACCCCAACAATGCAATGGCAAAACGGACAGAACATTCATTATAATGCCAAGCT : 576  
Nuphar\_a\_A : CTGAGGAGGAGCAGCATCACATCAGCAGCTGCTGTCGAGAGATGGGCAGACTCTCCAGTATGGTGGCCAACT : 414  
Magnolia\_g : TTGGAGAAAGTGGTGAAGTGTCTTCAAGTGTCTGGGACACAGCAACAATGTTCTTATAATGCCAATCT : 510  
Oryza\_s\_Os : CTGGAGGAAAGCAACCATCCGCGGAGCAAGTGTGGCAGCAGTATGAACGTGAGCTGAAAGTGCAGCAGCTT : 576  
Oryza\_s\_Os : CTGGAGGAGAGCAACCAGCATGGCAAA---GTGTTGGAGCACTACAGGCGGACGCTCATGTTCCAGCAGCGC : 573  
Asparagus\_ : TTGGAAGAGCAAGCCAGAATCAGCAACAAGTCTGGCAGGCTACAGCCGCGAGCCAGCCAAACCACAA--- : 573  
Asparagus\_ : TTGGAAGAAAGCAGCCAGAATCAACAACAAGTCTGGCAGGCTACAAATAGACAGCCAAATCAACCACAC--- : 573  
Acorus\_a\_A : TATGAGGCGAGCCCAACAAGAATCATCAGAGAGTGTGGCAGGCTATGGACAAACAGCCACTCAACAGCAA--- : 495  
Magnolia\_p : TTAGAGGAAAGGAGCACAGAATCAGATCAGGTGTGGCAACCATACAACCAGCAACAACCACAGCAA--- : 540  
Amborella\_ : CTAGAAGCAGCAGGA-----GGTGGATTTACAACTGCAGACCGGCTCAAGCCAG--- : 417  
Arabidopsi : TTAGCTGATGGGTAT---CAGATGCACCTCAGCTCAACCTTACGGTGTGTCATCATCATCAACAACACAA : 573



```

Zea_m_ZMM3 : CAAGAACACCTT---CAACTTGATCCTTGGCTGCATATAGGGTAT---GCTATGGACCACCTGAACAATGAT : 639
Sorghum_b_ : CAAGAACGCCCTT---CACCTTGATCCTTGCCTGCATATAGGGTAT---GCTATGGACCACATGAACAATGAT : 639
Triticum_a_ : CAGCAGCATTCT---CATCATGACCCCTTCCCTCCGTATGTGGTATGATGCTCTGGATCACTTGAACAAGGAA : 639
Triticum_a_ : CAGGAGTATTTT---CATCATGACCCCTTCCCTCCGTATGGGTATGATGCTCTGGATCACTTGAACAAGGAA : 633
Triticum_a_ : CAGGAGTATTTT---CATCATGACCCCTTCCCTGCATATAGGGTATCAAAATCTGGATCAGTTGAACAAGAA : 642
Lolium_p_L : CAGGAACATATTT---CACCCAGACCCGATCTGCATATAGGGTTTCATCTCTGGATCAACTGAACAATAAC : 642
Oryza_s_Os : -----TTTCTC---CATCCAGACCCCTTCCCTGCATATAGGGTAT---GCTATGGATCACCTCAACCAA--- : 633
Triticum_a_ : -----GTACAA---CACGAGGATACCTGCATGCAAATTTGGTATCTGCCATGGACCAGCTGAAC---AAA : 624
Lolium_p_L : CAGGGACTCCCTCCAATACCATGGTTCCCTGCATGCAAATTTGGTATCATTCCACGGACCAGCTGAACAACGAC : 642
Triticum_a_ : CCAGGACTTGCGGAACACCAAGATTCCTGCATGCAAATTTGGATACAATGCCGTGGACCAGCCGAACAACGAA : 648
Triticum_a_ : CCGGGACTGCGGCAACGCCAAGATTCCTGCATGCAAATTTGGTACCATACCATGGACCAGCTGAACAACGAA : 528
Oryza_s_Os : CAGGGTCTCTCCACCACCATGACCATTCCCTCCAGATTTGGTATCATGCCATGGACCATCTGAGCAATGAA : 645
Zea_m_ZMM8 : CAGGGACTCCCTTCAGCATGCGGATCCTTCCCTCCAGACACCTACCATGCCATGGACCAGCTGAAC---GAG : 639
Zea_m_ZMM1 : CAGGGGCTCCCTTCAGCACACCGATCCTTCCCTCCAGTTCGGGTACCATGCCATGGATCAGCTGAACAACGAG : 645
Sorghum_b_ : CAGGGACTCCCTTCAGCACACCGATCCTTCCCTCCAGATTTGGTACCATGCCATGGACCAGCTGAACAACGAG : 648
Triticum_a_ : -----TTTCTCCAGGCCCAATATCCTTCCCTCCAGCCAGTATTTTGGT---ACGGAT---GTGAACCAGCCG : 636
Triticum_m_ : -----TTTCTCCAGGCCCAATATCCTTCCCTCCAGCCAGTATTTTGGT---ATGGAT---GTGAACCAGCCG : 636
Lolium_p_L : -----TTTTTCCAGGCCCAAGAGCCCGTCCCTCCAGCTTCATTTTGGC---ATGGAT---GTGAACCAGCCG : 636
Zea_m_m31 : -----TTCTTCGTGGCTCAGAACCGGCTCCTGCAACTACATACCAT---ATGGAC---ATGAACCAGCAG : 636
Zea_m_m24 : -----TTCTTCAGGCTCAGAACCATTGTCTGCAACTACATACCAT---ATGGAC---ATGAACCAGCAG : 636
Sorghum_b_ : -----TTTCTCCAGGCC----- : -
Oryza_s_Os : -----TTTCTCCAGGCC-----GGGCTTCAT---GTGGAC---GTGAACCAGCCG : 615
Elaeis_g_A : AGGGGATTTCTTCCAGCCACACACCCCTCTGAGCAAATTTGGTACCATGTGATAGACCAGCCAAACGGAGGA : 648
Elaeis_g_A : GAGGAATTTCTTCCAGCCACACAC---CCTCTACAAAGTTGGTACCATATGATAGACCAGTCAAAACAAGGA : 606
Asparagus_ : GACAGGCTCTTTCAG-----CCTATACAGATTTGCTAATAGTGTGATGGATCAGTCGAATGCTGGA : 630
Asparagus_ : GACAGGTTCTTCCAG-----CCTTACGGATTTGGTAGTAGCGTGATGGATCAGTGGAACGCTGGA : 627
Acorus_a_A : GAGGACTTTCTTCCAACCTTCTGATCCATCACTCCATATTTGGTATCAG-----GTAAATGCTGCA : 636
Amborella_ : GAAGGCTTTCTTCCATCCCAGGATTCGATATTCCAAATTTGGATACCATTGCGCTGATCAGATGCCTGTGGCC : 648
Nuphar_a_A : GACGGGTTTACCATCCAGAGGACTCAACTCTCCAAATTTGGTATAAATACTCAAGAGCAGATAACTGTTGCA : 486
Magnolia_g : GAGGGATTTCTTCCAGCCTCATCAACCAAACTTCAGATGGGATACCATGTGGAAGATCAGATGACCGTTGCA : 582
Oryza_s_Os : AATGGGTTCTTCCATCCAGATGAACCCACCTTCCAGATTTGGTACCCT---GAGCATCATGAGGCGATG--- : 642
Oryza_s_Os : AACGGATTTCTTCCATTCCTCAAGAGCCCACTTCCAGATTCGGCTTTACTCCACAGATG-----AAC : 633
Asparagus_ : GAAGAGTTCTTCCATCCTCAACAGCCAAAGTCTGGGAGGCCAATGC----- : 618
Asparagus_ : GATCAATTTCTTCCATCCCAGCAACCCAGTTTACCAAATTTGGTTTTCAGCCTCAAATG-----CCC : 633
Acorus_a_A : AATGGATTTCTTTCATCCTCAACAACCCCACTACAAATTTGGGTACCATCCAACAATAACCCCTTGCAGCCAG : 567
Magnolia_p : GACGGATTTCTTCCATCCGAGGARCCCACTCTCCATATCGGGTATCAACCACAGATAACGATAGCAGCACCA : 612
Amborella_ : GACAACTTCTTTCATCCTCAAGACCCCAAGGCTACAAATAGCTTACCACCAACCAATACAGTTGCAGCCCT : 489
Arabidopsi : CAAGCTTTCTTCCAGCCTCAAGAACCATTCTTCAGATCCGGTATCAGGGGCAA---GATGGAATGGGAGCA : 642
t t g a c c t c a g g t

```

**Supplemental Figure 5. Sequence alignment of the *OsMADS34* and its homologs.**

Black dark and grey boxex indicate the similar nucleotides.

**Fig.S6**

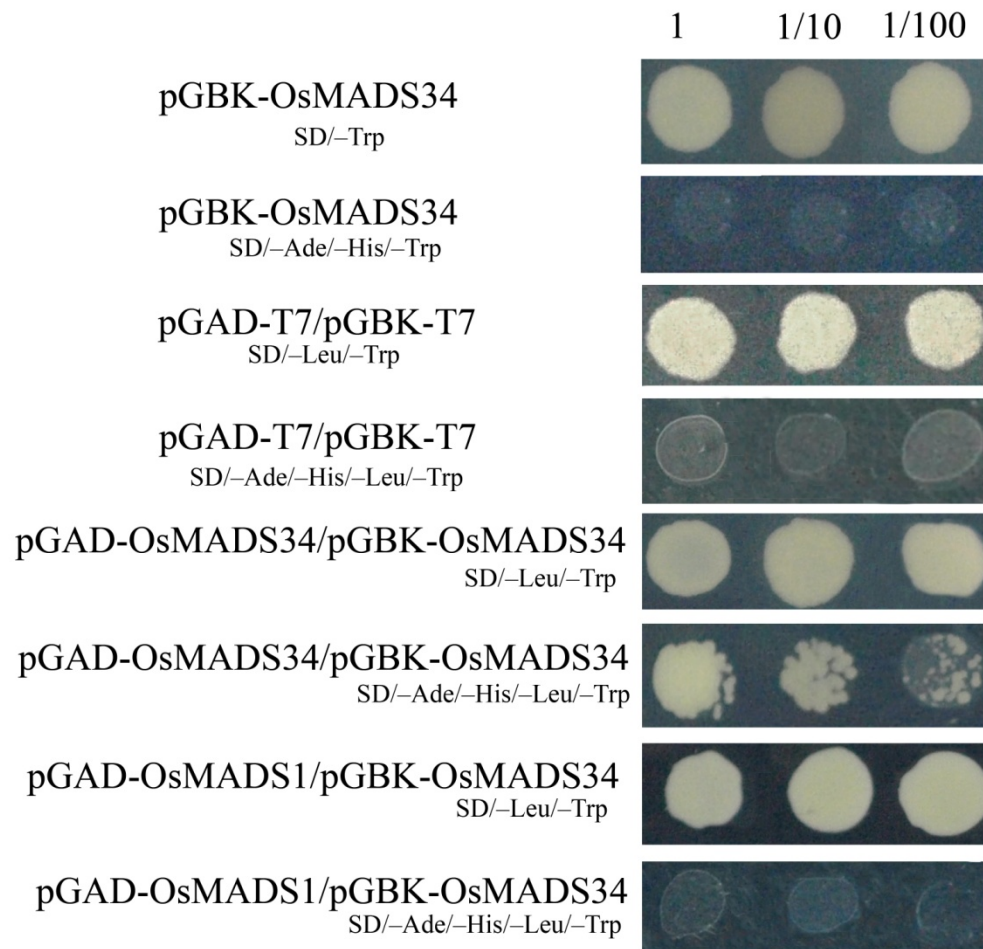

**Supplemental Figure 6. OsMADS34 has no transactivational activity, forms homodimer and has no interaction with OsMADS1 in yeast cells.**

Fig.S7

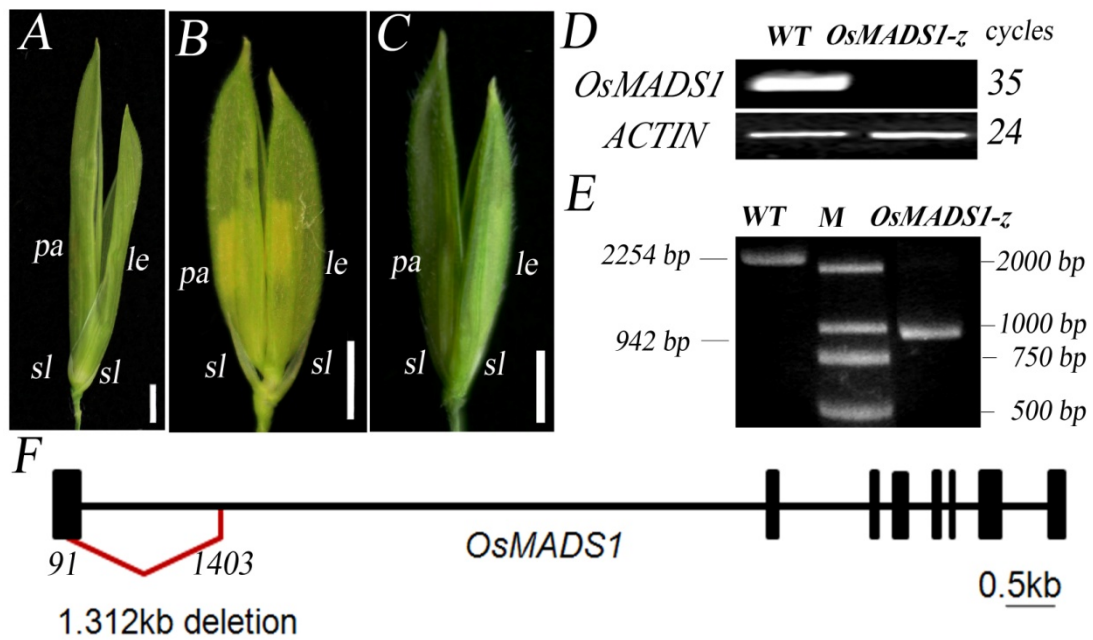

**Supplemental Figure 7. Analysis and identification of the *osmads1-z* mutant**

A-C are the allelic test between the *nsr* and *osmads1-z*; A: spikelet of *nsr*; B: spikelet of *osmads1-z*; C: spikelet of F1 progeny of *nsr* and *osmads1-z*. D: RT-PCR analysis of *OsMADS1* in wild-type and *osmads1-z*, no detectable transcript of *OsMADS1* was observed in the *osmads1-z* spikelet at stage In7; E: Identification of the deleted *OsMADS1* fragment in *osmads1-z* with smaller size compared with wild type, M indicates molecular marker.

Bar: 2 mm in A-C.
